# Supplementary material for: Regulation of chromatin binding by a conformational switch in the tail of the Ran exchange factor RCC1
Source: PubMed Central journal article supplement — J Cell Biol. 2008 Sep 8;182(5):827–36. doi: 10.1083/jcb.200803110 (PMC2528582; doi:10.1083/jcb.200803110), 2008-09-08
Supplement: jcb.200803110_3.pdf [file jcb.200803110_3.pdf]

Table S1. **Summary of effects on conformational change and chromatin binding**

| <b>Assay</b>                      | <b>Deletion of 1-20-aa tail</b> | <b>Addition of Ran(T24N)</b> | <b>Addition of Imp<math>\alpha</math>3</b> |
|-----------------------------------|---------------------------------|------------------------------|--------------------------------------------|
| Conformational change in the tail | No                              | Yes                          | Yes                                        |
| DNA binding                       | Decrease                        | Increase                     | Decrease                                   |
| Core histone binding              | Increase                        | Increase                     | Increase                                   |
| Chromatin binding                 | Decrease                        | Increase                     | Decrease                                   |
